# Supplementary material for: Biome representational in silico karyotyping
Source: HighWire-hosted journal article supplement (doi:10.1101/gr.115758.110), 2011-02-10

## Supplementary Figure Legends

Supplementary Figure 1: Histogram of tag recovery from human blood sample. A. Unamplified sample.  
B. Phi29 amplified sample.

Supplementary Figure 2: Karyotype analysis of unamplified human blood DNA sample by BRISK

Supplementary Figure 3: Karyotype analysis of amplified human blood DNA sample by BRISK

A.

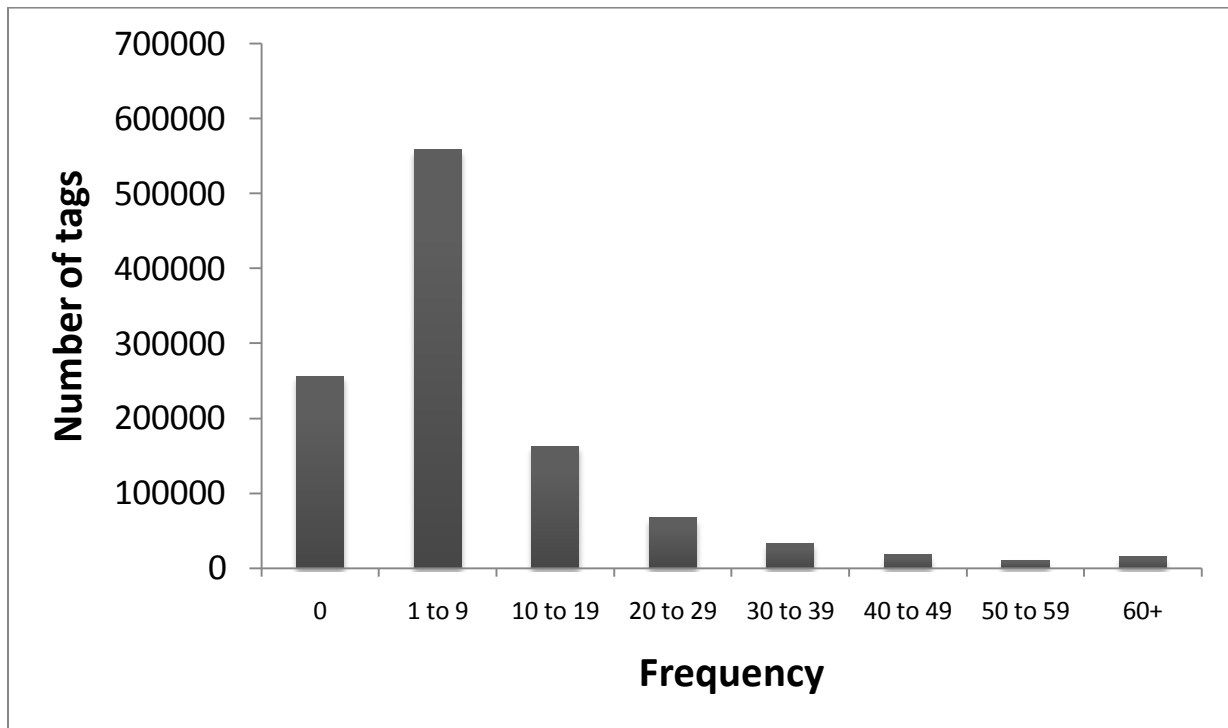

B.

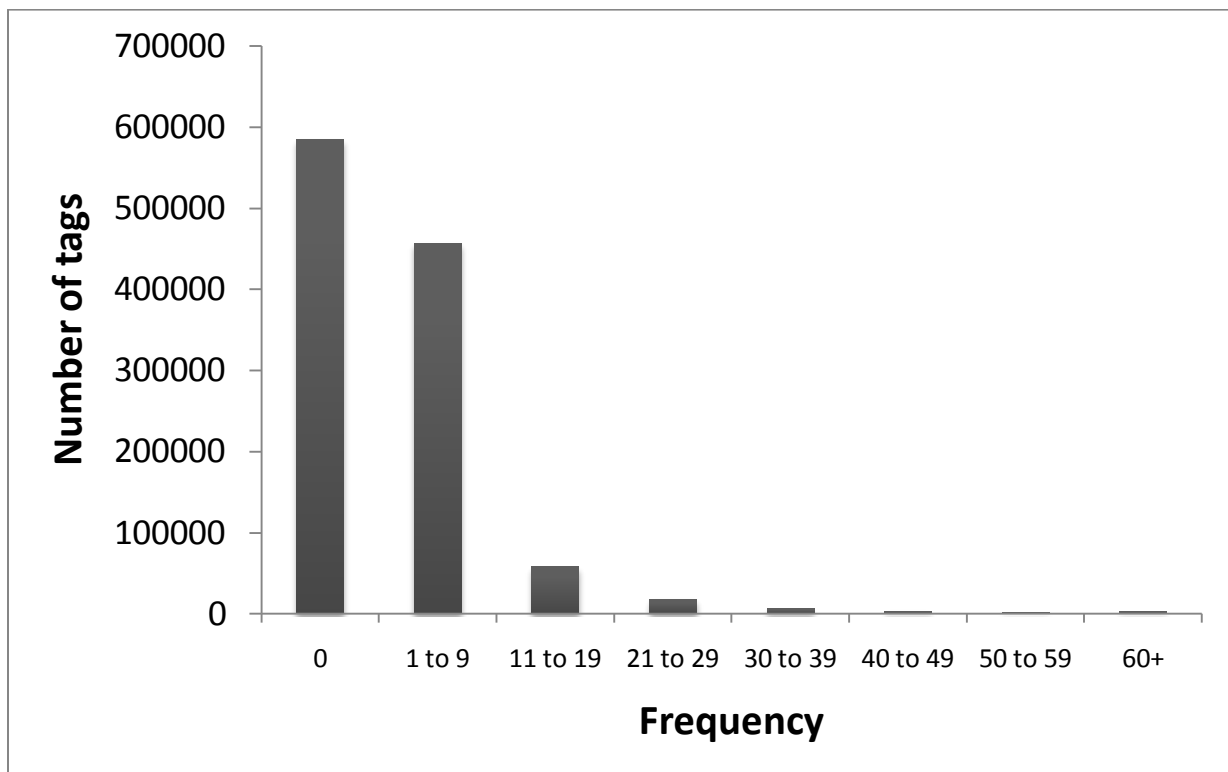

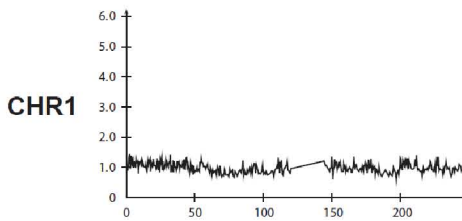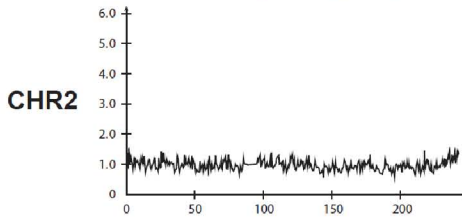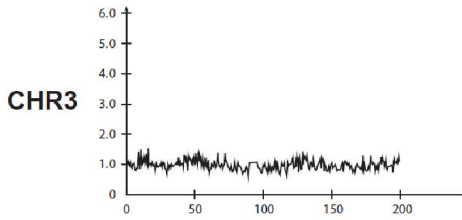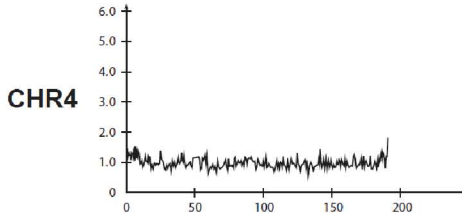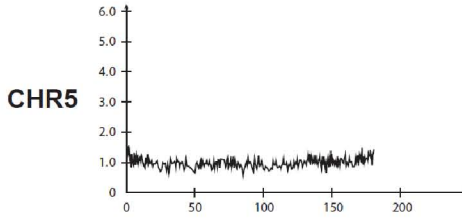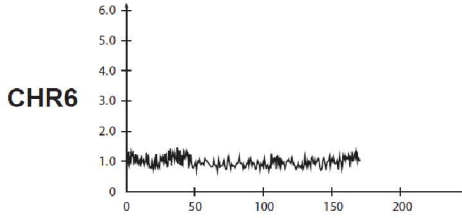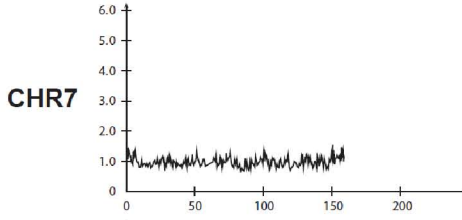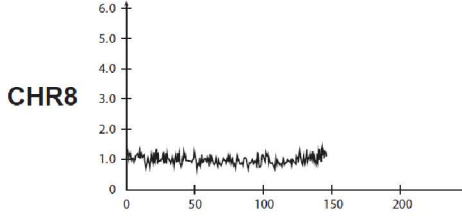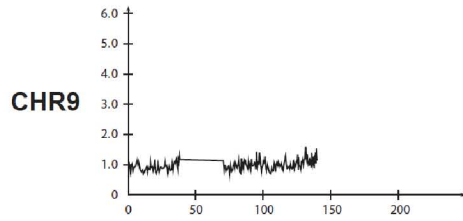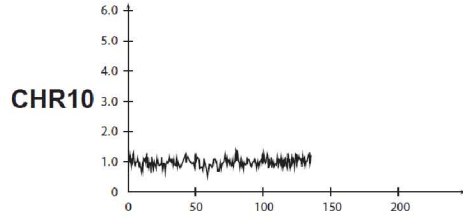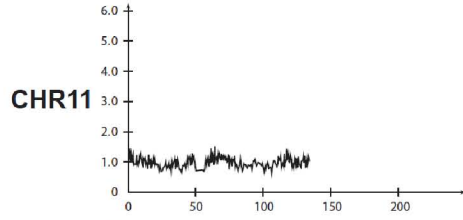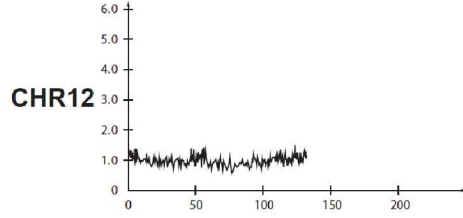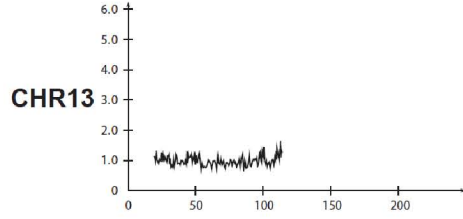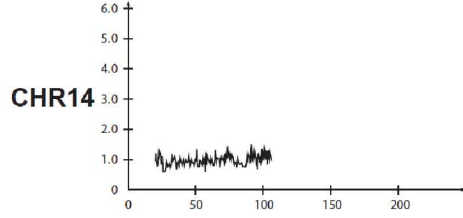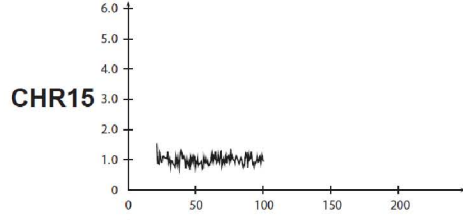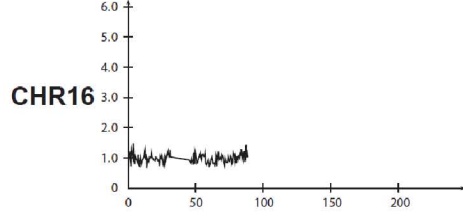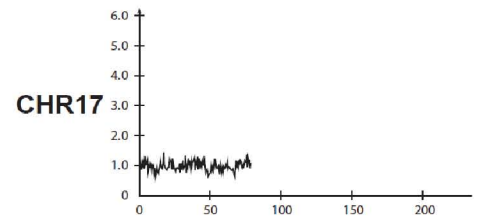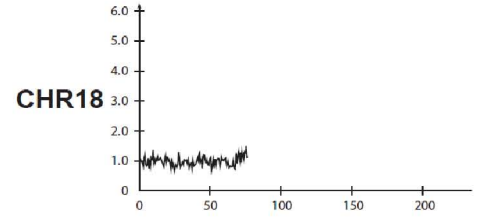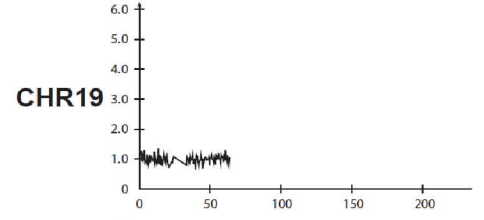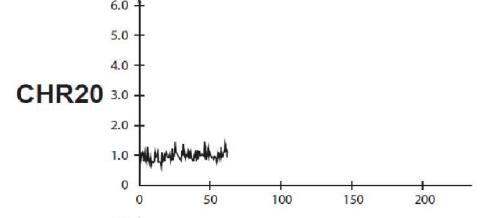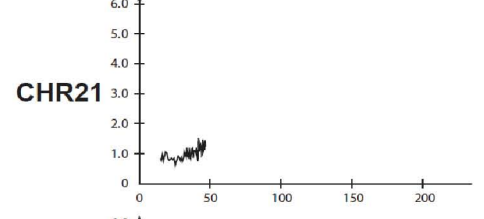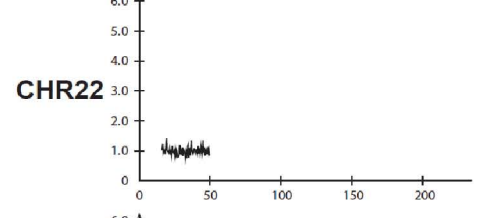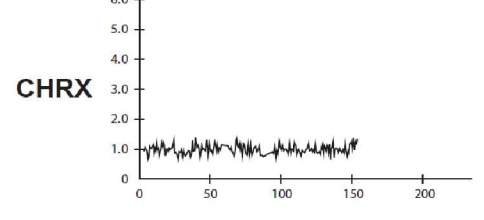

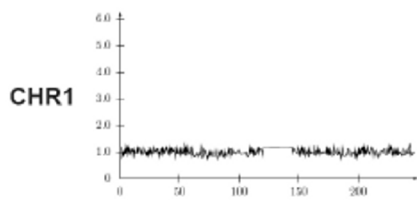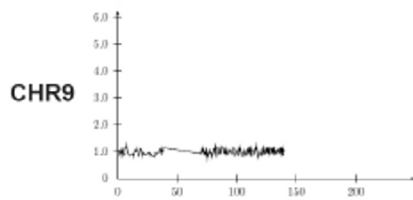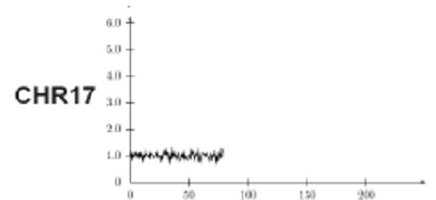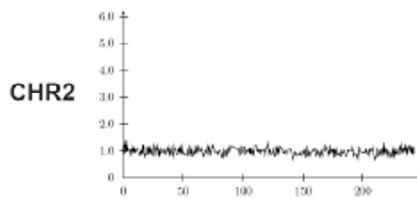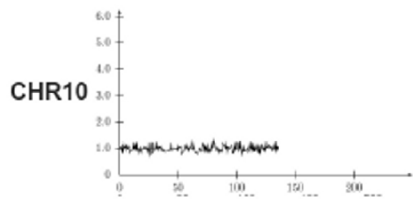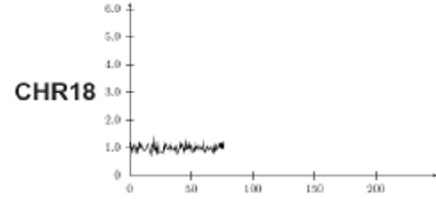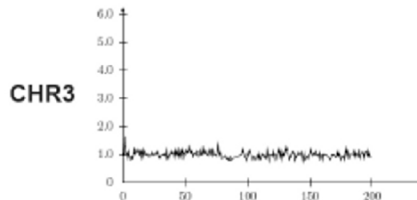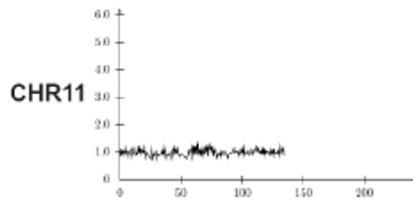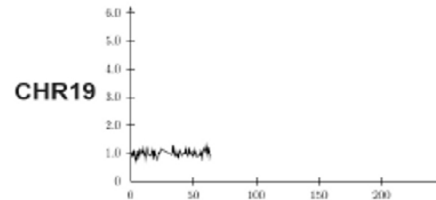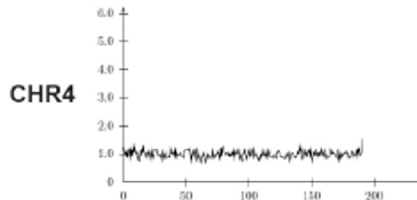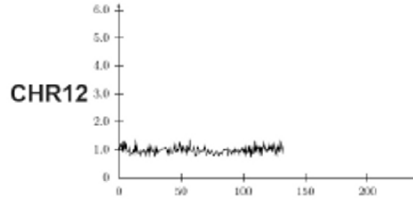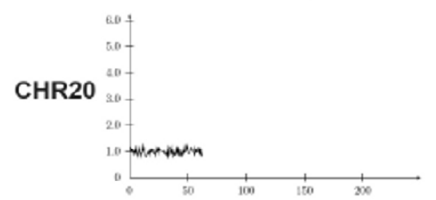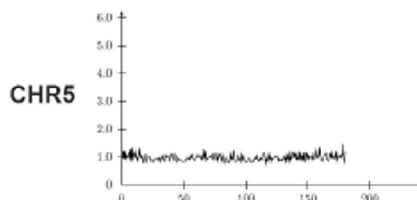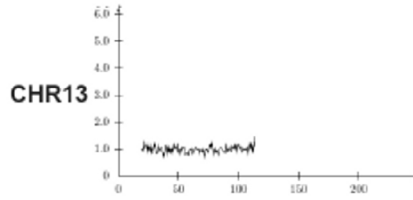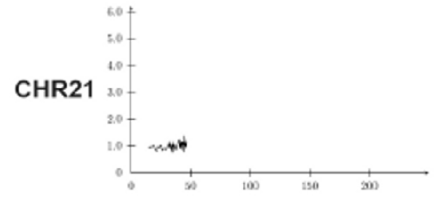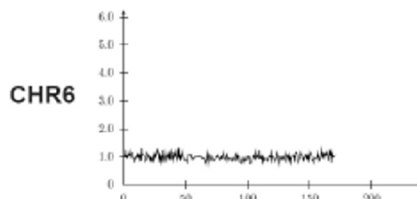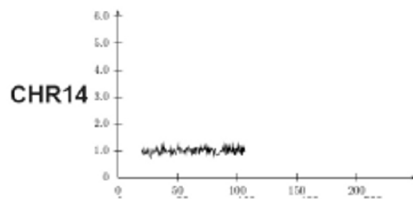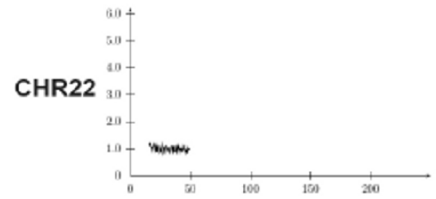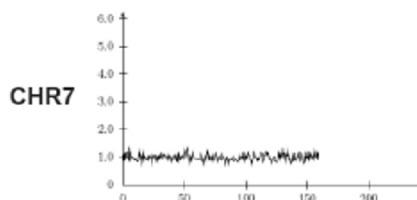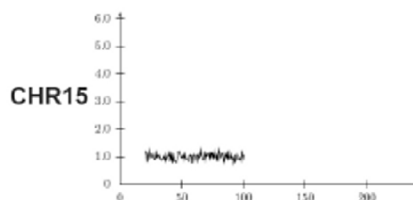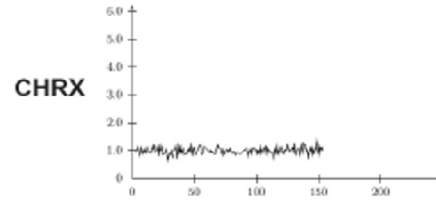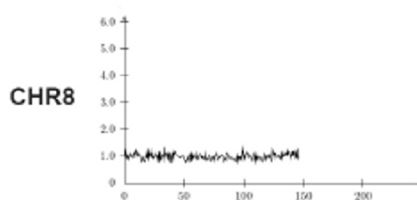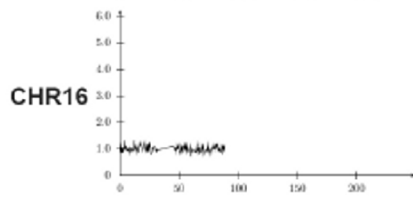

Supplement: Supplementary_materials.pdf [file Supplementary_materials.pdf]
